# Supplementary material for: Manifestation of anharmonicities in terms of Fano scattering and phonon lifetime of scissors modes in α-MoO3
Source: Royal Society of Chemistry journal article supplement (doi:10.1039/d4cp01627k), 2024-01-01
Supplement: d4cp01627k2.pdf [file d4cp01627k2.pdf]

## Manifestation of anharmonicities in terms of Fano scattering and phonon lifetime of scissors modes in $\alpha$ -MoO<sub>3</sub>

Ravindra Kumar Nitharwal,<sup>a</sup> Vivek Kumar,<sup>b</sup> Anubhab Sahoo,<sup>a</sup> M. S. Ramachandra Rao,<sup>a,c</sup> Tejendra Dixit,<sup>d\*</sup> and Sivarama Krishnan<sup>a,c\*</sup>

<sup>a</sup>Department of Physics, Indian Institute of Technology, Madras, Chennai-600036, E-mail: srkrishnan@iitm.ac.in

<sup>b</sup>Department of Physics, Indian Institute of Information Technology Design and Manufacturing, Kancheepuram, Chennai-600127, India

<sup>c</sup>Quantum Center of Excellence for Diamond and Emergent Materials (QuCenDiEM)

group, Indian Institute of Technology, Madras, Chennai -600036, India

<sup>d</sup>Optoelectronics and Quantum Device Group, Department of Electronics and Communication Engineering, Indian Institute of Information Technology Design and Manufacturing, Kancheepuram, Chennai-600127, India; E-mail: tdixit@iiitdm.ac.in

### Table of contents

**Fig. S1:** EDX of the  $\alpha$ -MoO<sub>3</sub>.

**Fig. S2:** Normalized temperature-dependent Raman spectrum of  $\alpha$ -MoO<sub>3</sub> (633 nm excitation).

**Table 1:** The calculated coupling coefficient and asymmetry ratio of scissors modes at various temperatures (633 nm excitation).

**Fig. S3:** Temperature-dependent PL spectra of  $\alpha$ -MoO<sub>3</sub> (488 nm excitation).

**Fig. S4:** Temperature-dependent Raman spectra of  $\alpha$ -MoO<sub>3</sub> (488 nm excitation).

**Fig. S5:** Fano-Raman line-shape fitted plot of scissors modes (488 nm excitation).

**Fig S6:** Variation of coupling coefficient and asymmetry ratio with temperature (488 nm excitation).

**Table 2:** The calculated coupling coefficient and asymmetry ratio values for scissors modes at different temperatures (488 nm excitation).

**Table 3:** Extracted parameters from the Fano-Raman line-shape fitting of 818  $cm^{-1}$  stretching mode at 633 nm excitation.

**Fig. S7:** Anharmonic variation in the frequency and linewidth of 818  $cm^{-1}$  ( $A_g$ ) stretching mode (633 nm excitation wavelength).

**Fig S8:** Variation in the Phonon lifetime of 818  $cm^{-1}$  ( $A_g$ ) stretching mode (633 nm excitation wavelength).

**Table 4:** Extracted parameters from the anharmonic model fitting of 818  $cm^{-1}$  ( $A_g$ ) mode.

**Table 5:** The shift in phonon frequency in conjunction with the rate of change in frequency resulting from temperature.

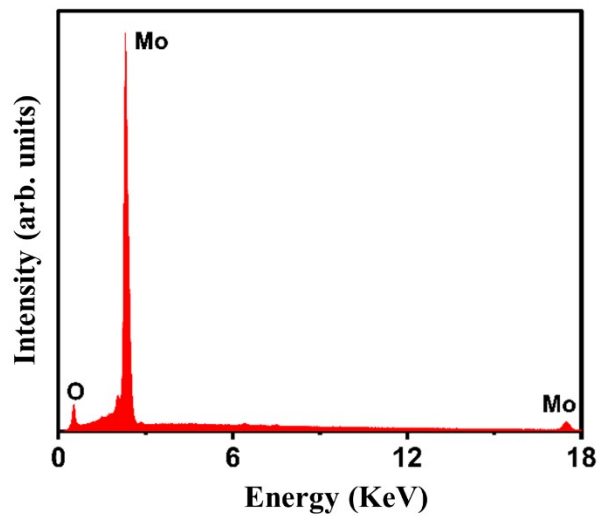

**Fig. S1.** EDX profile of  $\alpha$ -MoO<sub>3</sub> confirms that oxygen and molybdenum elements are present in the pellet.

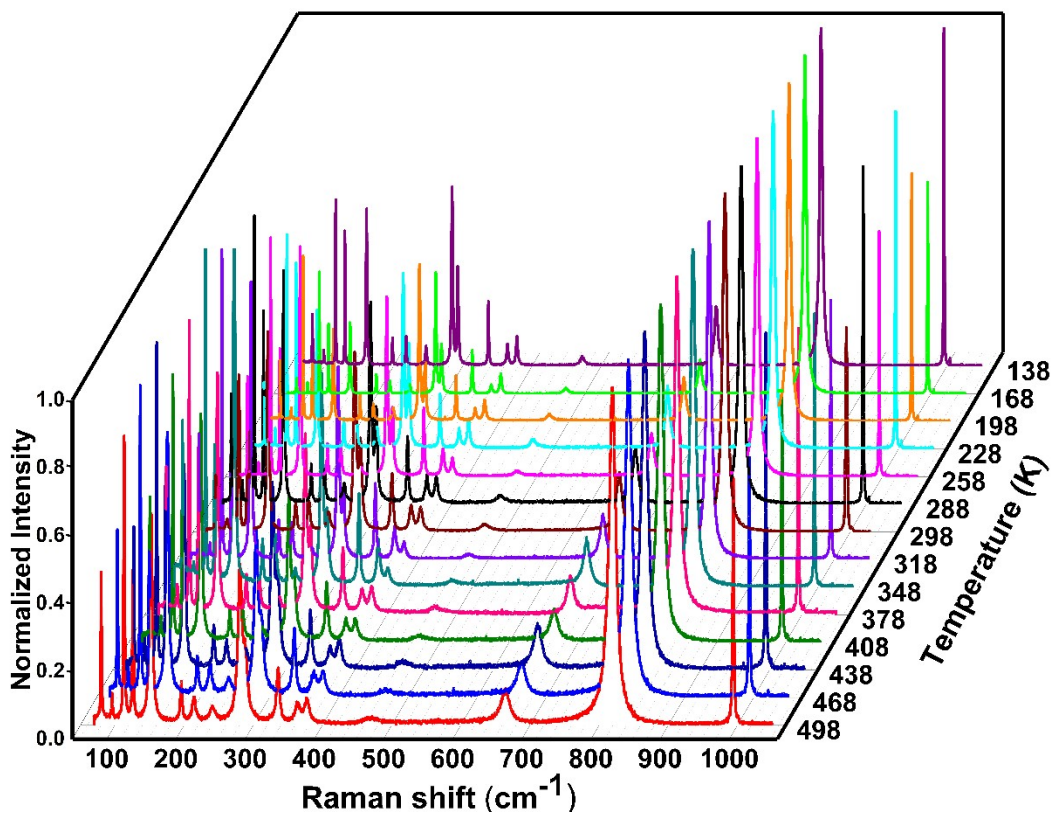

**Fig. S2.** Normalized temperature-dependent Raman spectrum of  $\alpha$ -MoO<sub>3</sub> pellet recorded using 633 nm laser excitation.

**Table 1.** Obtained coupling coefficient values from fitting of both scissors modes with Fano-Raman line-shape function and corresponding asymmetry ratio at 633 nm excitation wavelength.

| Temperature (K) | $A_g(1)$ mode              |                                                      | $B_{1g}(1)$ mode           |                                                      |
|-----------------|----------------------------|------------------------------------------------------|----------------------------|------------------------------------------------------|
|                 | Coupling coefficient (1/q) | Asymmetry ratio ( $\alpha_R = \Gamma_L / \Gamma_H$ ) | Coupling coefficient (1/q) | Asymmetry ratio ( $\alpha_R = \Gamma_L / \Gamma_H$ ) |
| 138             | 0.050                      | 1.00                                                 | -0.017                     | 1.01                                                 |
| 168             | 0.080                      | 0.96                                                 | -0.014                     | 1.00                                                 |
| 198             | 0.081                      | 0.95                                                 | -0.030                     | 1.05                                                 |
| 228             | 0.083                      | 0.94                                                 | -0.028                     | 1.02                                                 |
| 258             | 0.143                      | 0.88                                                 | -0.056                     | 1.10                                                 |
| 288             | 0.099                      | 0.93                                                 | -0.036                     | 1.08                                                 |
| 298             | 0.117                      | 0.92                                                 | -0.118                     | 1.19                                                 |
| 318             | 0.132                      | 0.90                                                 | -0.087                     | 1.15                                                 |
| 348             | 0.159                      | 0.87                                                 | -0.094                     | 1.16                                                 |
| 378             | 0.164                      | 0.84                                                 | -0.108                     | 1.18                                                 |
| 408             | 0.208                      | 0.78                                                 | -0.164                     | 1.28                                                 |
| 438             | 0.263                      | 0.75                                                 | -0.153                     | 1.20                                                 |
| 468             | 0.385                      | 0.70                                                 | -0.218                     | 1.35                                                 |
| 498             | 0.313                      | 0.73                                                 | -0.192                     | 1.30                                                 |

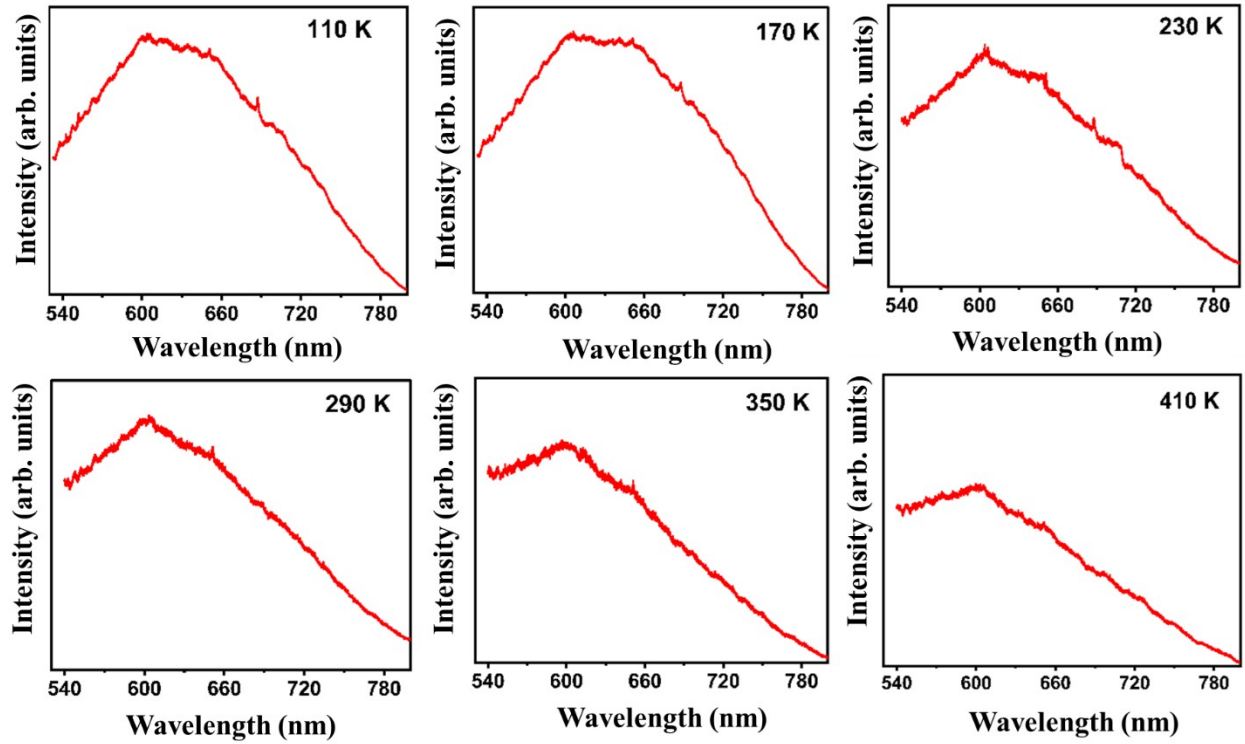

**Fig. S3.** Temperature-dependent PL spectra  $\alpha$ - $\text{MoO}_3$  at 488 nm laser excitation and observation of more energy continuum at higher temperatures.

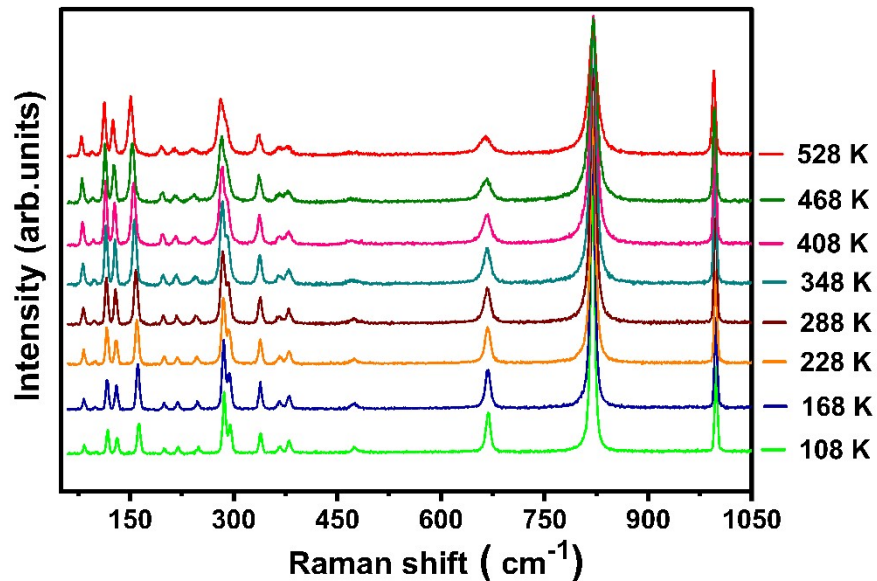

**Fig. S4.** Representative temperature dependence Raman spectra of  $\alpha$ -MoO<sub>3</sub> pellet recorded using 488 nm laser excitation.

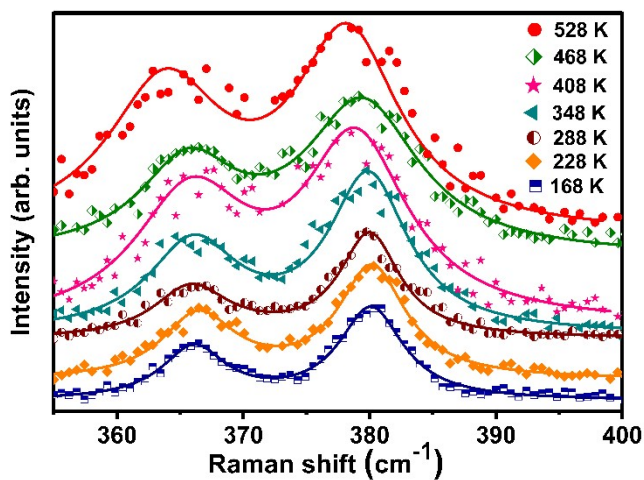

**Fig. S5.** Temperature-dependent asymmetric behavior of  $A_g(1)$  and  $B_{1g}(1)$  scissor modes at 488 nm laser excitation. Here, different colored lines represent the theoretical fitting at different temperatures using the Fano-Raman line-shape function.

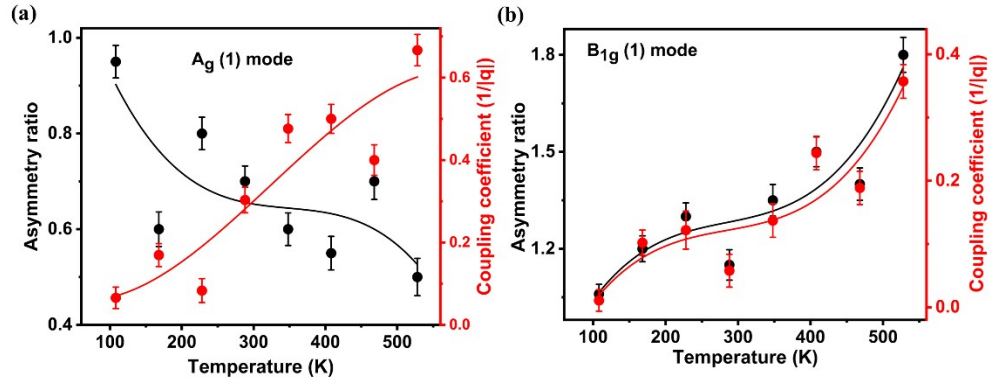

**Fig. S6.** Panels (a) and (b) show the variation in the asymmetry ratio (left y-axis) and coupling coefficient (right y-axis) with temperature for  $A_g(1)$  and  $B_{1g}(1)$  scissor modes at 488 nm excitation wavelength, respectively. The error bar represents the uncertainties in calculated fitting parameters.

**Table 2.** Coupling coefficient obtained by fitting of both scissor modes with the Fano-Raman line-shape function and corresponding asymmetry ratio at 488 nm excitation wavelength.

| Temperature (K) | $A_g(1)$ mode              |                                                       | $B_{1g}(1)$ mode           |                                                       |
|-----------------|----------------------------|-------------------------------------------------------|----------------------------|-------------------------------------------------------|
|                 | Coupling coefficient (1/q) | Asymmetry ratio ( $\alpha_{R= \Gamma_L / \Gamma_H}$ ) | Coupling coefficient (1/q) | Asymmetry ratio ( $\alpha_{R= \Gamma_L / \Gamma_H}$ ) |
| 108             | 0.065                      | 0.95                                                  | -0.010                     | 1.06                                                  |
| 168             | 0.169                      | 0.62                                                  | -0.102                     | 1.20                                                  |
| 228             | 0.083                      | 0.80                                                  | -0.121                     | 1.30                                                  |
| 288             | 0.303                      | 0.66                                                  | -0.057                     | 1.15                                                  |
| 348             | 0.476                      | 0.60                                                  | -0.137                     | 1.35                                                  |
| 408             | 0.500                      | 0.55                                                  | -0.237                     | 1.50                                                  |
| 468             | 0.400                      | 0.70                                                  | -0.188                     | 1.40                                                  |
| 528             | 0.660                      | 0.50                                                  | -0.357                     | 1.80                                                  |

**Table 3.** Obtained coupling coefficient by the fitting of  $818\text{ cm}^{-1}$  stretching mode with the Fano-Raman line-shape function and corresponding asymmetry ratio for a few temperatures at 488 nm and 633 nm excitation wavelengths.

| Temperature (K) | 488 nm                         |                                                    | 633 nm                         |                                                    |
|-----------------|--------------------------------|----------------------------------------------------|--------------------------------|----------------------------------------------------|
|                 | Coupling coefficient ( $1/q$ ) | Asymmetry ratio ( $\alpha_{R=\Gamma_L/\Gamma_H}$ ) | Coupling coefficient ( $1/q$ ) | Asymmetry ratio ( $\alpha_{R=\Gamma_L/\Gamma_H}$ ) |
| 168             | 0.00051                        | 1.004                                              | 0.00053                        | 1.002                                              |
| 228             | 0.00015                        | 1.000                                              | 0.00014                        | 1.000                                              |
| 288             | 0.00060                        | 1.005                                              | 0.00055                        | 1.003                                              |
| 348             | 0.00054                        | 1.003                                              | 0.00034                        | 1.001                                              |
| 408             | 0.00064                        | 1.006                                              | 0.00036                        | 1.002                                              |
| 468             | 0.00087                        | 1.008                                              | 0.00054                        | 1.005                                              |

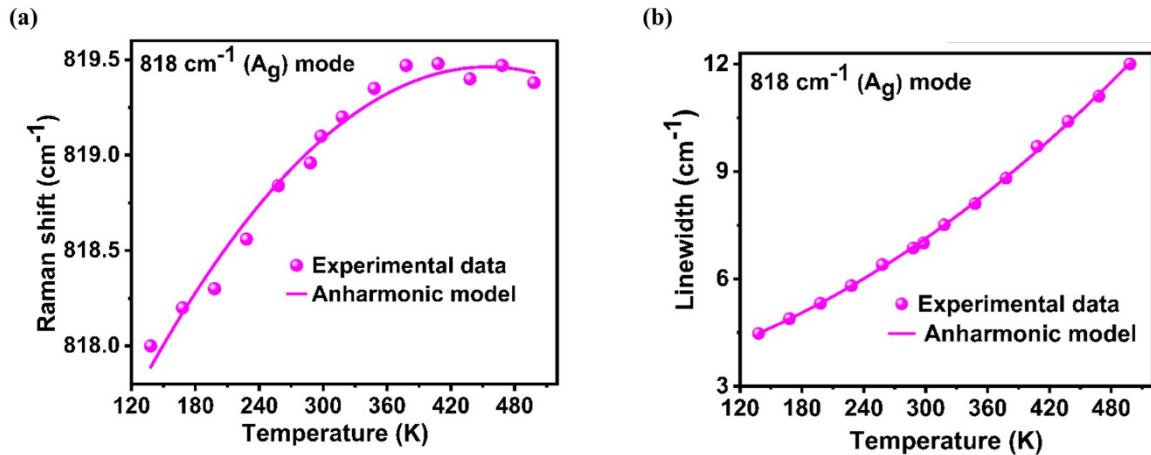

**Fig. S7.** (a) and (b) represent the temperature dependency of the  $818\text{ cm}^{-1}$  stretching mode's frequency and linewidth, respectively. The pink spheres refer to experimental data, and the solid pink line indicates the fitting of temperature-dependent frequency and linewidth using an anharmonic model at 633 nm excitation.

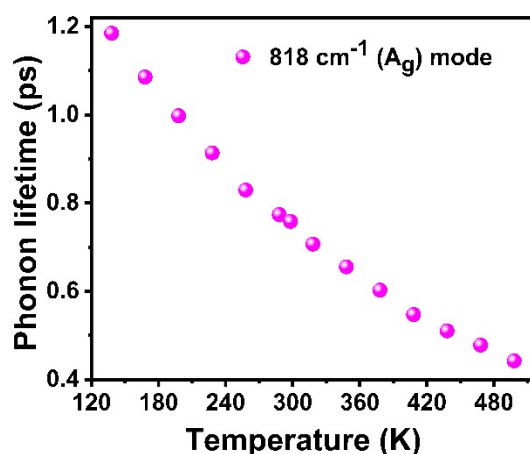

**Fig. S8.** Variation in the phonon lifetime of  $818 \text{ cm}^{-1}$  stretching mode with temperature at 633 nm excitation wavelength.

**Table 4.** Extracted parameters from the fitting of the  $818 \text{ cm}^{-1}$  ( $A_g$ ) stretching mode by the

| Anharmonic parameters | Extracted value                                |
|-----------------------|------------------------------------------------|
| $A$                   | $0.014 \pm 0.001$                              |
| $B$                   | $-1.57 \times 10^{-4} \pm 0.18 \times 10^{-4}$ |
| $C$                   | $0.061 \pm 0.95 \times 10^{-5}$                |
| $D$                   | $2.32 \times 10^{-4} \pm 0.15 \times 10^{-4}$  |

Anharmonic model.

**Table 5.** The extent of variation in phonon frequency in relation to the rate of change of frequency driven by temperature.

| Raman mode  | Position at 138 K ( $\text{cm}^{-1}$ ) | Position at 498 K ( $\text{cm}^{-1}$ ) | $\frac{d\omega}{dT}$ ( $\text{cm}^{-1}/\text{K}$ ) | Total shift ( $\text{cm}^{-1}$ ) |
|-------------|----------------------------------------|----------------------------------------|----------------------------------------------------|----------------------------------|
| $A_g(1)$    | 365.1                                  | 362.65                                 | 0.007                                              | -2.45                            |
| $B_{1g}(1)$ | 378.25                                 | 377.2                                  | 0.003                                              | -1.05                            |
| $A_g$       | 818                                    | 819.4                                  | 0.004                                              | 1.4                              |
