# Supplementary figures and images for: Manifestation of anharmonicities in terms of Fano scattering and phonon lifetime of scissors modes in α-MoO3
Source: Royal Society of Chemistry journal article supplement (doi:10.1039/d4cp01627k), 2024-01-01

Figure S1:

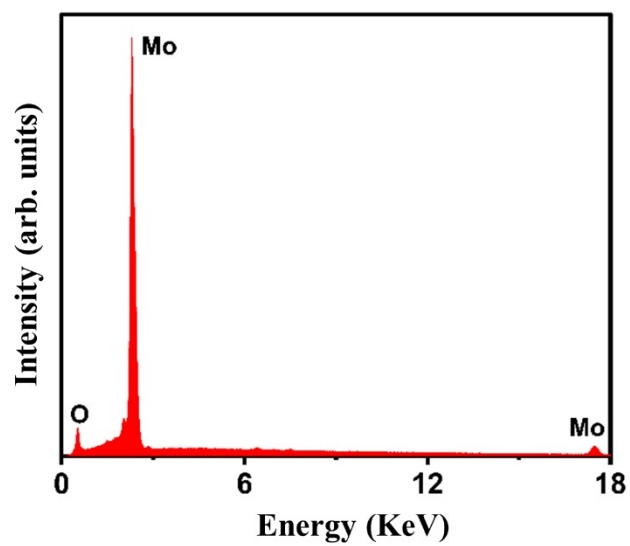

Figure S2:

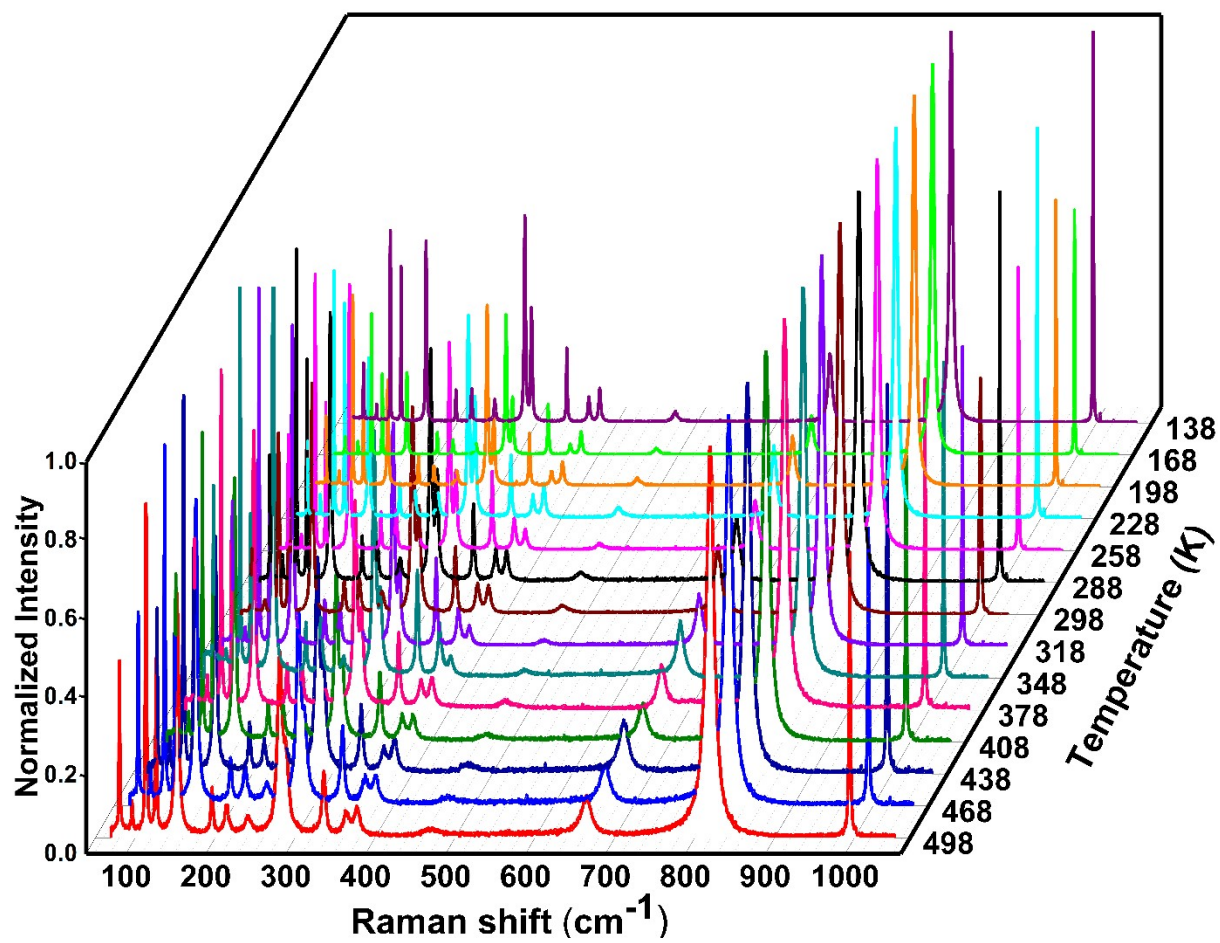

Figure S3:

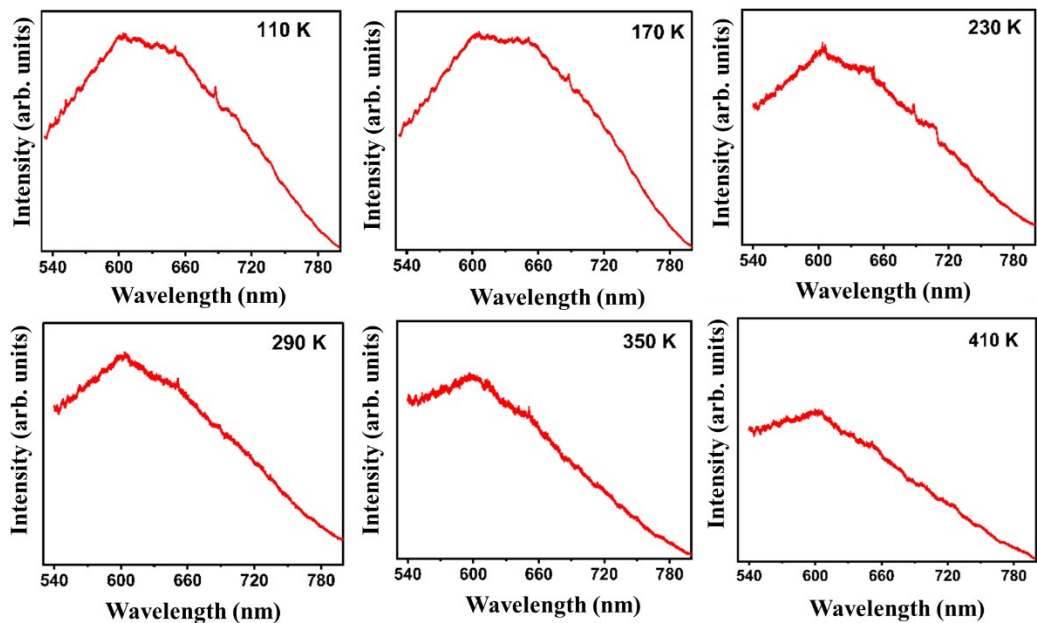

Figure S4:

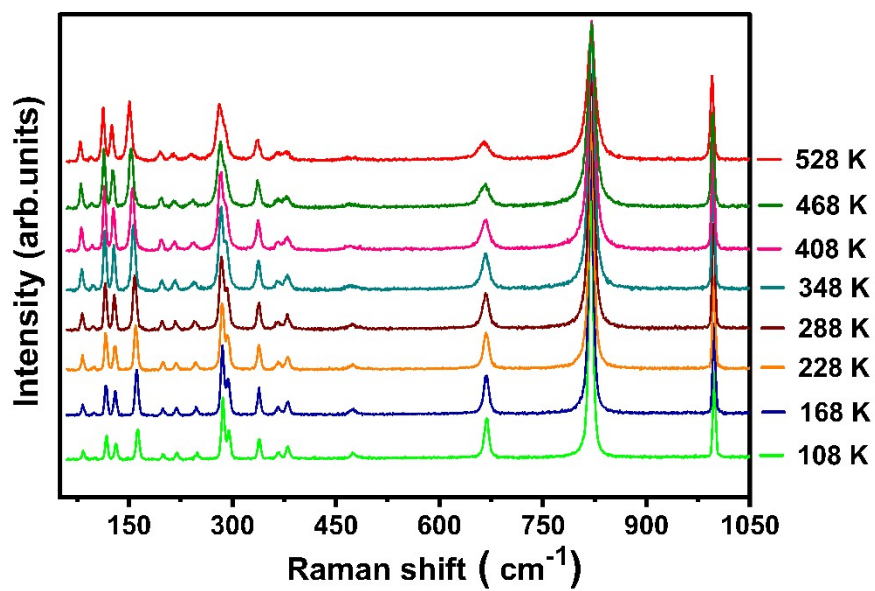

Figure S5:

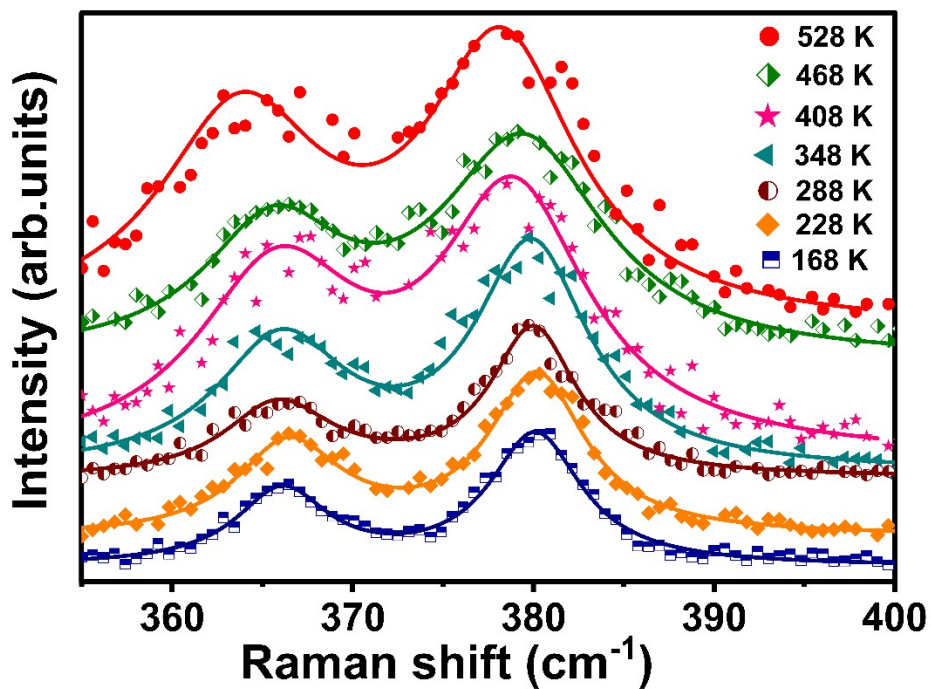

Figure S6

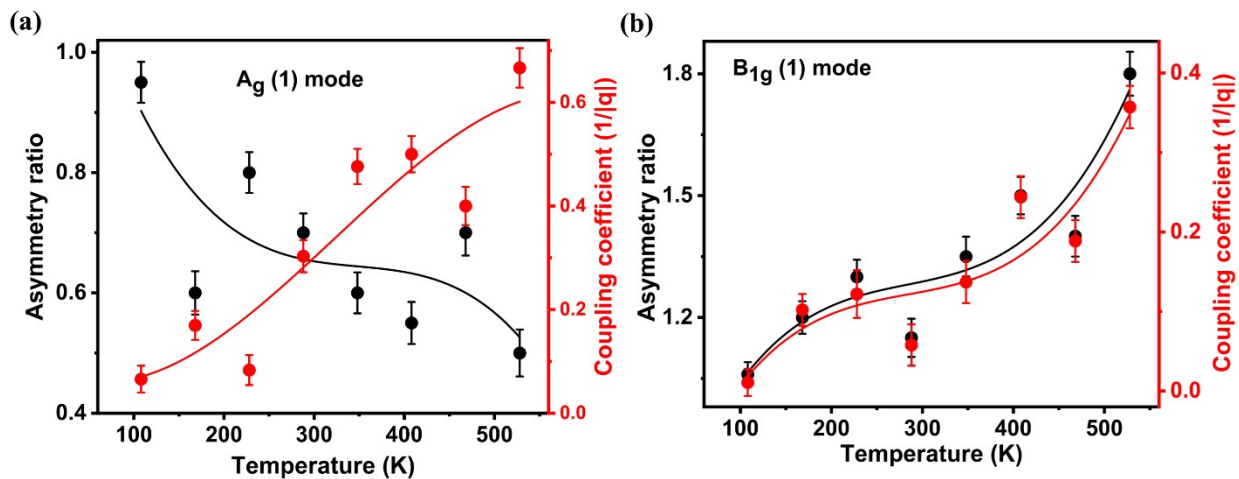

Figure S7:

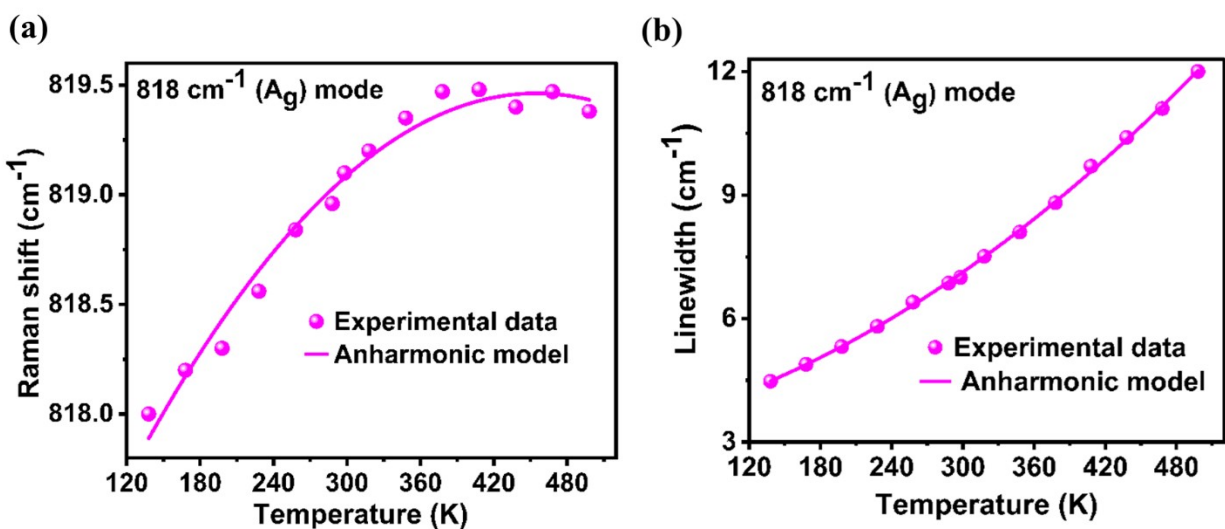

Figure S8:

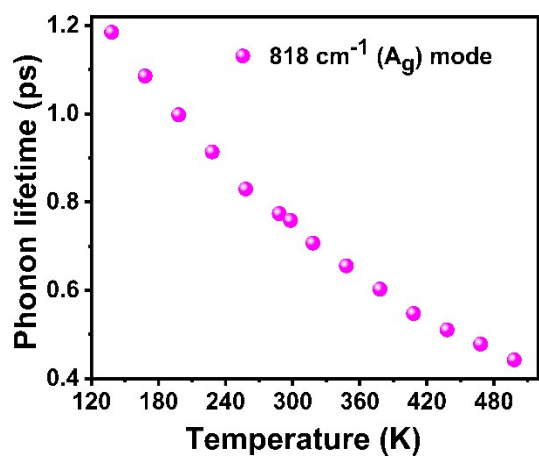

Supplement: d4cp01627k1.pdf [file d4cp01627k1.pdf]
